1 **The Contribution of Commonly Diagnosed Genetic Disorders to Small for Gestational**  
2 **Age Birth and Subsequent Morbidity and Mortality in Preterm Infants**

3  
4 Miles Bomback, MPH,<sup>1</sup> Selin Everett, BS,<sup>2</sup> Alex Lyford, PhD,<sup>3</sup> Rakesh Sahni, MD,<sup>4</sup> Faith Kim,  
5 MD,<sup>4</sup> Caitlin Baptiste, MD,<sup>2</sup> Joshua E. Motelow, MD, PhD,<sup>5</sup> Veeral Tolia, MD,<sup>6,7,8</sup> Reese Clark,  
6 MD,<sup>6</sup> Thomas Hays, MD, PhD<sup>4</sup>

7  
8 <sup>1</sup> Feinberg School of Medicine, Northwestern University, Chicago

9 <sup>2</sup> Division of Maternal Fetal Medicine, Department of Obstetrics and Gynecology, Columbia  
10 University Medical Center, New York City

11 <sup>3</sup> Middlebury College, Department of Mathematics, Middlebury, Vermont

12 <sup>4</sup> Division of Neonatology, Department of Pediatrics, Columbia University Irving Medical Center,  
13 New York City

14 <sup>5</sup> Division of Critical Care and Hospital Medicine, Department of Pediatrics, Columbia University  
15 Medical Center, New York City

16 <sup>6</sup> The Pediatrix Center for Research, Education, Quality and Safety, Sunrise, Florida

17 <sup>7</sup> Division of Neonatology, Department of Pediatrics, Baylor University Medical Center, Dallas,  
18 Texas

19 <sup>8</sup> Pediatrix Medical Group, Dallas, Texas

20  
21  
22 Corresponding Author: Thomas Hays, [th2712@cumc.columbia.edu](mailto:th2712@cumc.columbia.edu), 622 West 168<sup>th</sup> S, Suite PH  
23 17W-303, New York, New York, 10032

24  
25 Word Count:

26

27 **Abstract**

28 **Objective:**

29 Preterm infants born small, vs. appropriate for gestational age (SGA, AGA) are at greater risk  
30 for morbidity and mortality. The contribution of genetic disorders to preterm SGA birth,  
31 morbidity, and mortality is unknown. We sought to determine the association between genetic  
32 disorders and preterm SGA birth, and the association between genetic disorders and morbidity  
33 or mortality within preterm SGA infants. We hypothesized that genetic disorders were  
34 significantly associated with both.

35 **Study Design:**

36 This was a retrospective multicenter cohort study of 409 339 infants, born 23–33 weeks'  
37 gestation between 2000 and 2020. The odds of preterm SGA (vs AGA) birth, and the odds of  
38 severe morbidity or mortality within SGA preterm infants were determined for infants with  
39 genetic disorders, after adjusting for known risk factors.

40 **Results:**

41 Genetic disorders were present in 3.0 and 1.3% of SGA and AGA preterm infants respectively;  
42 genetic disorders conferred an aOR (95% CI) of 2.06 (1.92, 2.21) of SGA birth. Genetic  
43 disorders were present in 4.3 of preterm SGA infants with morbidity or mortality and 2.1% of  
44 preterm SGA infants that did not experience morbidity or mortality. Genetic disorders conferred  
45 an aOR (95% CI) of 2.12 (2.66, 3.08) of morbidity or mortality.

46 **Conclusions:**

47 Genetic disorders are strongly associated with preterm SGA birth, morbidity, and mortality.  
48 Clinicians should consider genetic testing of preterm SGA infants, particularly in the setting of  
49 other comorbidities or anomalies. Prospective, genomic research is needed to clarify the  
50 contribution of genetic disorders to disease in this population.

51

52

53

## 54 **Introduction**

55 Preterm infants experience a profound burden of morbidity and mortality, and small for  
56 gestational age (SGA) birth is one of the strongest clinical risk factors for poor outcomes.<sup>1-9</sup>  
57 SGA is defined as birth weight less than the 10<sup>th</sup> percentile or two standard deviations below  
58 mean for gestational age and sex based on estimates of population distributions.<sup>10-13</sup> The  
59 mechanism(s) by which SGA birth confers clinical risk are largely unknown. Known factors  
60 including impaired metabolic reserve explain only a fraction of these outcomes.<sup>14</sup> Although there  
61 are known risks for SGA birth, including maternal, placental, infectious, genetic, and  
62 environmental factors, the etiology of SGA birth is poorly understood. Known risks include  
63 maternal.<sup>14-16</sup>

64

65 The overall contribution of genetic disorders to preterm SGA birth is unknown. Fetal growth  
66 restriction (FGR) and continued poor fetal growth often impacts the decision to prematurely  
67 deliver a fetus. Multiple studies have found genetic disorders associated with FGR.<sup>17,18</sup> Higher  
68 rates of aneuploidy and copy number variants are found in FGR, particularly when presenting  
69 before 32 weeks' gestation or accompanied by other fetal anomalies.<sup>19,20</sup> Metanalysis of exome  
70 and genome sequencing for FGR demonstrated single gene disorders in 4% of isolated FGR  
71 and 30% of FGR accompanied by other anomalies.<sup>17</sup> Genetic disorders have been shown to  
72 contribute to morbidity and severe mortality in related populations as well. Genetic disorders  
73 have been found in 6% of stillbirths, 10% of fetal structural anomalies, and in 20% of cohorts of  
74 pediatric critical illness or perinatal disease.<sup>21-26</sup>

75

76 Given the burden of illness experienced by preterm SGA infants, emerging evidence that  
77 genetic disorders cause FGR and SGA, and evidence that genetic disorders cause critical  
78 illness in related populations, we sought to determine the contribution of commonly diagnosed

79 genetic disorders to preterm SGA birth, morbidity, and mortality. The Pediatrix Clinical  
80 Datawarehouse (CDW) contains detailed health records of these infants, including the presence  
81 of genetic disorders diagnosed during standard clinical care.

82

### 83 **Materials/Subjects and Methods:**

84 This study was approved by the institutional review board of Columbia University with a waiver  
85 for informed consent. This was a retrospective multicenter cohort study using the Pediatrix  
86 CDW. The CDW includes records from approximately 400 community and academic NICUs  
87 (levels I–IV) in 35 US states and Puerto Rico, which provided care to approximately 20% of  
88 preterm infants born in the United States during the study period. Data was entered by clinicians  
89 using admission, progress, and discharge notes, as well as results from laboratory, imaging,  
90 and other diagnostic studies. These data were then extracted, consolidated, and processed to  
91 populate the CDW.<sup>27</sup> Data included demographic and maternal characteristics, diagnoses made  
92 by clinicians (genetic disorders, morbidities), and hospital disposition (mortality, discharge  
93 home, or transfer). The results of negative test results, including for genetic disorders, were not  
94 available. Records of 409 399 infants born from 23 to 33 weeks' gestation, discharged from  
95 2000 to 2020 were extracted. Data from NICU admission to discharge were collected. Birth  
96 weight was normalized within the cohort by gestational age and sex. Cases were excluded if  
97 these data were missing. Infants were classified as SGA for normalized birth weight below the  
98 10<sup>th</sup> percentile or as appropriate for gestational age (AGA) at the 10<sup>th</sup> percentile or above and  
99 less than the 90<sup>th</sup> percentile. Infants with birth weight greater than the 90<sup>th</sup> percentile were  
100 excluded to prevent the confounding impact of poor outcomes in LGA infants. We determined  
101 the overlap of this definition with SGA defined by Fenton criteria and by the Eunice Kennedy  
102 Shriver National Institute of Child Health and Human Development (NICHD) consensus FGR  
103 definition.<sup>10,28</sup>

104

105 *Association of Genetic Disorders with SGA versus AGA birth among preterm infants*

106 We performed multiple variable logistic regression of the association of the following maternal  
107 and infant characteristics: ethnicity/race (maternal self-declared), maternal age, diagnosis of  
108 genetic disorders, the presence of congenital anomalies (defined as clinician diagnosed  
109 anomalies of the heart, gastrointestinal tract, brain, lungs, kidneys and urinary tract, or the  
110 presence of hydrops), and year of discharge. Congenital anomalies themselves are strongly  
111 associated with genetic disorders. Therefore, we tested for an interaction between congenital  
112 anomalies and genetic disorders with the outcome of SGA birth.

113

114 This analysis was also repeated limiting the cohort to infants born following singleton gestation  
115 to test the effect of multiple gestation. Unadjusted odds of SGA versus AGA birth were  
116 determined for each genetic disorder in which SGA birth was observed. The prevalence rate of  
117 SGA birth across maternal age was also determined.

118

119 *Association of genetic disorders with morbidity and mortality within preterm SGA infants*

120 Next, we evaluated factors associated with severe morbidity or mortality within preterm SGA  
121 infants. To limit ascertainment bias, infants transferred after birth or prior to discharge were  
122 excluded from the analysis of clinical outcomes.<sup>29</sup> Multivariable logistic regression was  
123 performed for severe morbidity or mortality as a combined clinical outcome. Severe morbidity  
124 was defined as any of the following: acute kidney injury (AKI) defined by the diagnosis of  
125 oliguria or anuria (ICD-9 788.5 or ICD-10: R34); severe intracranial hemorrhage (ICH) defined  
126 as grade III or IV intraventricular hemorrhage by Papile criteria or cystic periventricular  
127 leukomalacia;<sup>30</sup> medically or surgically treated necrotizing enterocolitis (NEC); severe  
128 bronchopulmonary dysplasia (BPD) defined as invasive mechanical ventilation at 36 weeks'  
129 postmenstrual age; severe retinopathy of prematurity (ROP) defined as need for any medical or  
130 surgical intervention; culture-positive sepsis defined by any positive blood or urine culture; or

131 shock defined as administration of any vasopressor or inotrope. The following were covariates:  
132 exposure to antenatal betamethasone, mode of delivery (vaginal delivery was treated as  
133 reference), phenotypic sex (female was treated as reference given the associated risk of  
134 morbidity in male infants),<sup>31,32</sup> race (White race was treated as reference given the proportional  
135 size), gestational age, birth weight Z-score, discharge year epoch (2000-2004, 2005-2009,  
136 2010-2014, 2015-2020), intubation in the first 72 hours of life, presence of a known genetic  
137 disorder, and the presence of congenital anomalies. This analysis was repeated limiting the  
138 cohort to infants born following singleton gestation to test the effect of multiple gestations. As  
139 before, we also tested for an interaction between genetic disorders and congenital anomalies  
140 and the outcome of morbidity or mortality.

141  
142 Finally, we sought to evaluate how SGA preterm infants with or without congenital anomalies  
143 compared to AGA preterm infants with respect to rates of morbidity and mortality. Using AGA  
144 preterm infants as reference for both analyses, we determined the crude odds ratios (OR) of  
145 individual comorbidities for preterm infants born SGA without congenital anomalies and for  
146 preterm infants born SGA with congenital anomalies. Analyses were made using RStudio  
147 version 2022.07.0 (R Project for Statistical Computing) (eMethods in the **Supplement**).<sup>33</sup>

148  
149 **Results**  
150 378 887 SGA and AGA infants were identified in this cohort (**Table 1**). Of these, 176 791  
151 (46.7%) were female. The mean (SD) gestational age was 30.1 (2.86) weeks, and the mean  
152 (SD) birth weight was 1.44 (0.49) kg. Genetic disorders were diagnosed in 5 386 (1.4%) infants.  
153 Congenital anomalies were present in 24 463 (6.4%) of infants. 36 985 (9.8%) infants were  
154 defined as SGA. 36 985 infants met this definition, all of whom were below the 10<sup>th</sup> percentile for  
155 NICHD fetal growth (**Supplemental Figure 1**). 33 451 (92.1%) of these infants were also below  
156 the Fenton 10<sup>th</sup> percentile definition of SGA birth.

157

158 *Association of Genetic Disorders with SGA versus AGA birth among preterm infants*

159 Genetic disorders were present in 1112 (3.0%) of the 36 985 preterm SGA infants and in 4274  
160 (1.3%) of the 341 902 preterm AGA infants in this cohort. Multivariable logistic regression  
161 demonstrated higher adjusted OR of SGA versus AGA birth for infants born to mothers  
162 identifying as Asian or Black (versus White) and lower for those born to mothers identifying as  
163 Hispanic (versus White) (**Figure 1**). Known genetic disorders and congenital anomalies (except  
164 for fetal hydrops and pulmonary anomalies) were also found to be associated with SGA birth in  
165 preterm infants. SGA birth was not found to vary across the period of this study (2000–2020).  
166 Nearly identical results were found for all covariates when this regression was limited to infants  
167 born following singleton gestation (**Supplemental Figure 2**). Greater maternal age was also  
168 associated with SGA birth (**Figure 3**). The association between genetic disorders and SGA birth  
169 was not driven by a single genetic disorder. Rather, SGA birth was associated with multiple  
170 known diagnoses including trisomy 13, trisomy 18, trisomy 21, Turner syndrome, unspecified  
171 aneuploidy, unspecified copy number variant, sickle cell anemia, cystic fibrosis,  
172 hypophosphatasia, and the presence of multiple genetic disorders (**Supplemental Table 1**). As  
173 a secondary analysis, we repeated this regression testing for an interaction between the  
174 presence of genetic disorders and the presence of any congenital anomaly. We found that these  
175 factors each independently associated with SGA versus AGA birth in preterm infants, but we did  
176 not find a significant interaction between these factors and SGA birth.

177

178 *Association of genetic disorders with morbidity and mortality within preterm SGA infants*

179 We next focused on morbidity and mortality within the subset of 36 985 SGA preterm infants.  
180 After excluding infants transferred in or to other facilities, and those with missing data, 28 983  
181 SGA preterm infants remained (**Figure 2**). Genetic disorders were present in 375 (4.3%) of the  
182 8810 preterm SGA infants that experienced severe morbidity or mortality as compared to 415

183 (2.1%) of the 20 173 preterm AGA infants that did not experience these outcomes. Antenatal  
184 betamethasone, birth in later years, maternal identification as Asian or Black (versus White),  
185 increased gestational age, and increased birth weight all were associated with lower adjusted  
186 odds of morbidity or mortality. Male sex, maternal identification as Hispanic (versus White),  
187 intubation in the first 72 hours of life, the presence of known genetic disorders, or congenital  
188 anomalies were associated with greater adjusted odds of morbidity or mortality. Nearly identical  
189 results were found for all covariates when this regression was limited to infants born following  
190 singleton gestation pregnancy (**Supplemental Figure 3**). Compared to AGA preterm infants,  
191 SGA preterm infants with or without other congenital anomalies experienced higher rates of  
192 death and every comorbidity, with the exception of severe ICH, which was observed to occur  
193 less frequently in infants with isolated SGA status compared to all AGA infants. (**Table 2**). As a  
194 secondary analysis, we repeated this regression with a test for an interaction between the  
195 presence of genetic disorders and the presence of any congenital anomaly. We found that SGA  
196 preterm infants with genetic disorders and congenital anomalies had an adjusted odds ratio  
197 (95% confidence interval) of 1.52 (1.03, 2.27) for severe morbidity or mortality.

198

## 199 **Discussion**

200 The primary finding of our study was that genetic disorders were strongly and nonspecifically  
201 associated with preterm SGA birth, morbidity, and mortality. There are important strengths,  
202 limitations, and clinical implications of this finding. Our analysis revealed several secondary  
203 findings as well: lower birth weight and higher risk of illness in preterm infants with cystic fibrosis  
204 and hypophosphatasia, a synergistic risk of illness in infants with congenital anomalies and  
205 genetic disorders, and a lower rate of severe ICH in preterm SGA infants without congenital  
206 anomalies. In the following we discuss the primary and secondary findings of our research.

207



208 Using a highly generalizable cohort, we found that commonly diagnosed genetic disorders were  
209 twice as prevalent in SGA infants compared to AGA infants, and that genetic disorders were  
210 strongly associated with SGA birth weight after adjusting for known risk factors. Genetic  
211 disorders were also strongly associated with severe morbidity and mortality in this population.  
212 We confirmed previously described associations between common aneuploidies and SGA birth,  
213 morbidity, and mortality. Interestingly, we found a broad association between genetic disorders  
214 and preterm SGA birth. Of the 20 genetic disorders analyzed (including “unspecified” cases of  
215 aneuploidy or copy number variants), significant associations with SGA birth were found in 10,  
216 and nonsignificant trends towards this association were found in 8. Cystic fibrosis has recently  
217 been implicated as a cause of lower birth weight and earlier gestation of birth,<sup>34</sup> which our data  
218 support. We also found evidence of a novel association between hypophosphatasia and  
219 preterm SGA birth, as well as significantly greater odds of morbidity or mortality. If confirmed,  
220 these findings might illuminate pathogenic mechanisms of growth restriction.

221  
222 Multiple gestations have typically been excluded in large cohort studies limiting the  
223 generalizability of findings. We found similar results with or without this exclusion. However, we  
224 did not evaluate pairwise outcomes within twin or greater multiple gestations. Clinicians and  
225 families, particularly in the setting of growth discordant twins, often must consider risks and  
226 benefits in timing of delivery. Targeted focus on SGA multiple gestations could help better  
227 inform these decisions, as well as validate twin-specific growth charts.<sup>35</sup> Unique factors in twin  
228 pregnancies including unequal placentation, twin-twin transfusion, and birth weight discordance  
229 all may influence clinical outcomes, and should be explored further.<sup>36,37</sup>

230  
231 In addition to genetic disorders, we found that congenital anomalies were strongly associated  
232 with preterm SGA birth, morbidity, and mortality. Congenital anomalies of the kidney, heart,  
233 brain, and other organ systems are themselves strongly linked to genetic disorders. It is unclear

234 if anomalies themselves caused lower birth weight and illness, or if anomalies were the sentinel  
235 features of underlying genetic disorders. A parsimonious explanation is that underlying genetic  
236 disorders contribute to congenital anomalies, poor fetal growth, and severe morbidity. This is  
237 further supported by the finding that genetic disorders and congenital anomalies interacted to  
238 confer synergistically greater risk of morbidity and mortality in SGA preterm infants.

239  
240 Intriguingly, preterm SGA infants without congenital anomalies were found to have lower odds  
241 of severe ICH compared to AGA infants. Fetal growth restriction and SGA birth have been  
242 described as protective against severe intraventricular hemorrhage in extremely preterm (born <  
243 28 weeks' gestation) infants.<sup>6,8,38-40</sup> The implication of a lower risk of severe ICH in SGA birth  
244 without other anomalies warrants attention given reports of higher risk of neurodevelopmental  
245 impairment including poorer cognitive outcomes in this population.<sup>41</sup> Administration of antenatal  
246 corticosteroids reduces the risk of severe IVH and mortality, but studies have suggested that  
247 steroids in SGA preterm infants may not reduce serious morbidities.<sup>42,43</sup> Although a previous  
248 landmark trial reported a potential reduction in severe IVH but no effect on neurosensory  
249 impairment with the use of prophylactic indomethacin in extremely low birth weight infants,  
250 multiple studies have refuted this finding.<sup>44-46</sup> Replication, functional validation, and basic  
251 investigation into protection of IVH in growth restricted extremely preterm infants may inform  
252 novel therapies.

253  
254 Our study had several compelling strengths. This represents the largest and most  
255 comprehensive examination of factors associated with preterm SGA status and comorbidities to  
256 our knowledge. This was a multicenter investigation of infants from diverse backgrounds, with  
257 generalizable results. There are important limitations to this study. Infants born SGA may be  
258 more likely to undergo pre- or postnatal genetic testing, especially in the presence of other  
259 congenital anomalies or comorbidities. Details regarding testing, including time (pre- or

260 postnatal) and indication are unknown in this cohort. Genetic testing has also undergone  
261 dramatic changes from 2000 to 2020. There is likely substantial heterogeneity in the genetic  
262 workups performed across this period. Unfortunately, data are not available regarding the  
263 spectrum of testing performed in the cohort, including negative results. There may also be  
264 heterogeneity in the assignment of gestational age. The method used to determine this for each  
265 individual in the cohort is unknown. Additionally, SGA and FGR are defined differently in the  
266 literature of this field. We defined SGA birth here using the distribution of birth weight found  
267 within this cohort. This definition increases the internal validity of our analysis but may limit  
268 generalization. Given that our definition of SGA shared 92.1% with Fenton-defined SGA infants,  
269 this is unlikely. The optimal criteria for defining a newborn as SGA or growth restricted likely  
270 include individual environmental, genetic, and biological factors, many of which are yet  
271 unknown. These analyses also did not consider when growth restriction occurred during  
272 pregnancy, patterns of growth restriction (such as head-sparing or symmetric), fetal exposures,  
273 postnatal growth patterns, or social determinants of health. Our dataset lacks maternal records,  
274 including the presence of comorbidities that may contribute to placental insufficiency. Our  
275 finding that extremes of maternal age, as well as increasing maternal age from 18 to 34 years,  
276 were associated with SGA status likely reflects the contribution of these maternal factors.

277  
278 Genetic counseling and consideration of testing for FGR is recommended by the American  
279 College of Obstetricians and Gynecologists as well as by the Society for Maternal and Fetal  
280 Medicine.<sup>47,48</sup> There is not yet consensus regarding the postnatal evaluation of SGA infants.<sup>49,50</sup>  
281 Scarce data exist regarding how often genetic workups or testing are actually performed pre- or  
282 postnatally for these indications. Furthermore, perinatal genetic disorders often present  
283 nonspecifically and are often diagnosed belatedly.<sup>51,52</sup> The indications and potential benefit for  
284 genetic testing in this population is unknown without prospective, genome-wide testing.

285

286 Our findings have implications for clinical practice and further research. Clinicians should  
287 strongly consider genetic testing of preterm SGA infants, particularly in the setting of other  
288 comorbidities or anomalies. Genetic disorders were found in 3.0% of preterm SGA infants  
289 overall and 4.3% of preterm SGA infants with severe morbidity and mortality. These represent  
290 underestimates as prospective testing was not performed. Without prospective genetic testing  
291 the baseline rate genetic disorders in this population is unknown. Preterm SGA infants with  
292 genetic disorders or congenital anomalies may be at higher risk for morbidity and mortality.  
293 Clinicians should consider this risk when counseling families, evaluating the risks and benefits  
294 of management decisions, or estimating the pre-test probability of diagnostic tests. Prospective  
295 genomic research is urgently needed to clarify the contribution of genetic disorders to disease in  
296 this population.

297

298

299

300 **Acknowledgements**

301 The authors wish to gratefully acknowledge Dr. Ali G. Gharavi (Columbia University Irving  
302 Medical Center) and his research team, as well as Dr. Joseph M. Feinglass (Feinberg School of  
303 Medicine, Northwestern University) for their mentorship and thoughtful review of this project.

304

305 Authors TH and JEM are supported by *Thrasher Research Fund Early Career Awards*. TH is  
306 also supported by the *NIH National Center for Advancing Translational Sciences*  
307 (KL2TR001874).

308

309

310 **Supplemental Materials**

311 **Supplemental Table 1.** Unadjusted odds of SGA birth within diagnosed genetic disorders.

312 **Supplemental Figure 1.** Classification of SGA or FGR birth in this cohort by related criteria.

313 **Supplemental Figure 2.** Multivariable logistic regression for SGA versus AGA status in preterm  
314 infants with singleton gestation.

315 **Supplemental Figure 3.** Multivariable logistic regression for severe morbidity or mortality in

316 SGA preterm infants following singleton gestation.

317 **eMethods.** R studio script used for this project.

318 **Table 1.** Descriptive characteristics of cohort

| <b>Characteristic</b>          | <b>AGA<br/>(N=341902)</b> | <b>SGA<br/>(N=36985)</b> | <b>P-value</b> |
|--------------------------------|---------------------------|--------------------------|----------------|
| <b>Sex</b>                     |                           |                          |                |
| Female                         | 159615 (46.7%)            | 17176 (46.4%)            | 0.375          |
| Male                           | 182287 (53.3%)            | 19809 (53.6%)            |                |
| <b>Gestational Age (weeks)</b> |                           |                          |                |
| Mean (SD)                      | 30.1 (2.88)               | 30.2 (2.69)              | <0.001         |
| Median [Min, Max]              | 31.0 [23.0, 33.0]         | 31.0 [23.0, 33.0]        |                |
| <b>Race and Ethnicity</b>      |                           |                          |                |
| Asian                          | 9698 (2.8%)               | 1152 (3.1%)              | <0.001         |
| Black                          | 79022 (23.1%)             | 10128 (27.4%)            |                |
| Hispanic                       | 66839 (19.5%)             | 6157 (16.6%)             |                |
| Other                          | 25385 (7.4%)              | 2851 (7.7%)              |                |
| White                          | 160958 (47.1%)            | 16697 (45.1%)            |                |
| <b>Maternal Age</b>            |                           |                          |                |
| Mean (SD)                      | 28.1 (6.52)               | 28.5 (6.57)              | <0.001         |
| Median [Min, Max]              | 28.0 [10.0, 60.0]         | 28.0 [10.0, 58.0]        |                |
| Missing                        | 1494 (0.4%)               | 126 (0.3%)               |                |
| <b>Discharge Year</b>          |                           |                          |                |
| 2000 to 2004                   | 56242 (16.4%)             | 5979 (16.2%)             | 0.025          |
| 2005 to 2009                   | 90974 (26.6%)             | 9809 (26.5%)             |                |
| 2010 to 2014                   | 91931 (26.9%)             | 9810 (26.5%)             |                |
| 2015 to 2020                   | 102755 (30.1%)            | 11387 (30.8%)            |                |
| <b>Genetic Disorder</b>        |                           |                          |                |
| Absent                         | 337628 (98.8%)            | 35873 (97.0%)            | <0.001         |
| Present                        | 4274 (1.3%)               | 1112 (3.0%)              |                |
| <b>Congenital Anomaly</b>      |                           |                          |                |
| Absent                         | 321063 (93.9%)            | 33361 (90.2%)            | <0.001         |
| Kidney or urinary tract        | 5082 (1.5%)               | 834 (2.3%)               |                |
| Heart                          | 5555 (1.6%)               | 925 (2.5%)               |                |
| Central nervous system         | 3718 (1.1%)               | 611 (1.7%)               |                |
| Gastrointestinal tract         | 3674 (1.1%)               | 649 (1.8%)               |                |
| Hydrops                        | 321 (0.1%)                | 36 (0.1%)                |                |
| Multiple organ systems         | 2066 (0.6%)               | 513 (1.4%)               |                |
| Pulmonary                      | 423 (0.1%)                | 56 (0.2%)                |                |

319 Abbreviations: AGA (appropriate for gestational age), SGA (small for gestational age)

320 **Table 2.** Unadjusted odds of mortality or severe morbidities in preterm SGA infants.

| Outcome                           | OR (99.44% CI)                                                                |                                                                                       |
|-----------------------------------|-------------------------------------------------------------------------------|---------------------------------------------------------------------------------------|
|                                   | Preterm SGA Infants without Congenital Anomalies (versus AGA Preterm Infants) | Preterm SGA Infants with Additional Congenital Anomalies (versus AGA Preterm Infants) |
| Mortality or any morbidity        | 1.45 (1.39, 1.50)                                                             | 4.86 (4.33, 5.46)                                                                     |
| Mortality                         | 1.99 (1.87, 2.12)                                                             | 5.96 (5.20, 6.83)                                                                     |
| Acute kidney injury               | 1.60 (1.46, 1.75)                                                             | 5.03 (4.22, 6.00)                                                                     |
| Severe intracranial hemorrhage    | 0.82 (0.75, 0.91)                                                             | 1.89 (1.52, 2.36)                                                                     |
| Severe necrotizing enterocolitis  | 1.28 (1.18, 1.40)                                                             | 3.50 (2.91, 4.21)                                                                     |
| Severe bronchopulmonary dysplasia | 2.40 (2.13, 2.70)                                                             | 9.50 (7.78, 11.59)                                                                    |
| Severe retinopathy of prematurity | 1.52 (1.33, 1.74)                                                             | 3.14 (2.31, 4.27)                                                                     |
| Sepsis                            | 1.37 (1.29, 1.45)                                                             | 3.22 (2.81, 3.68)                                                                     |
| Shock                             | 1.35 (1.28, 1.43)                                                             | 3.18 (2.78, 3.64)                                                                     |

321 Abbreviations: CI (confidence interval), OR (odds ratio), SGA (small for gestational age)

322

323

324



| Variable                    | N                | Odds ratio | p                        |
|-----------------------------|------------------|------------|--------------------------|
| <b>Race and Ethnicity</b>   | White            | 177138     | Reference                |
|                             | Asian            | 10811      | 1.10 (1.04, 1.18) 0.002  |
|                             | Black            | 88877      | 1.24 (1.21, 1.28) <0.001 |
|                             | Hispanic         | 72747      | 0.89 (0.86, 0.92) <0.001 |
|                             | Other            | 27694      | 1.07 (1.03, 1.12) 0.001  |
| <b>Maternal Age (years)</b> | 10-19            | 36857      | Reference                |
|                             | 20-29            | 182044     | 1.12 (1.08, 1.16) <0.001 |
|                             | 30-39            | 142563     | 1.19 (1.15, 1.24) <0.001 |
|                             | 40-49            | 15600      | 1.33 (1.25, 1.42) <0.001 |
|                             | 50-60            | 203        | 1.54 (0.98, 2.29) 0.046  |
| <b>Discharge Year</b>       | 2000 to 2004     | 62190      | Reference                |
|                             | 2005 to 2009     | 100052     | 1.01 (0.97, 1.04) 0.717  |
|                             | 2010 to 2014     | 101153     | 0.98 (0.95, 1.02) 0.329  |
|                             | 2015 to 2020     | 113872     | 1.00 (0.97, 1.04) 0.939  |
| <b>Genetic Disorder</b>     | Absent           | 371906     | Reference                |
|                             | Present          | 5361       | 2.06 (1.92, 2.21) <0.001 |
| <b>Congenital Anomaly</b>   | Absent           | 352898     | Reference                |
|                             | Cardiac          | 6458       | 1.51 (1.41, 1.62) <0.001 |
|                             | Gastrointestinal | 4304       | 1.68 (1.55, 1.83) <0.001 |
|                             | Hydrops          | 356        | 1.03 (0.72, 1.43) 0.869  |
|                             | Multiple         | 2568       | 2.18 (1.97, 2.40) <0.001 |
|                             | Neurological     | 4311       | 1.54 (1.41, 1.68) <0.001 |
|                             | Pulmonary        | 476        | 1.28 (0.96, 1.68) 0.081  |
|                             | Renal            | 5896       | 1.58 (1.47, 1.70) <0.001 |

325  
 326 **Figure 1:** Multivariable regression of clinical characteristics of preterm infants born SGA versus  
 327 AGA. Regression was performed for the outcome of SGA birth within infants born before 34  
 328 weeks' gestation. Maternal identification as Hispanic was associated with lower adjusted odds  
 329 of SGA status. Maternal identification as Asian or Black, advancing maternal age, the presence  
 330 of a known genetic disorder, and the presence of congenital anomalies (excluding hydrops and  
 331 pulmonary anomalies) were associated with greater adjusted odds of SGA status.

332  
 333

| Variable                          | N                | Odds ratio               | p                          |
|-----------------------------------|------------------|--------------------------|----------------------------|
| <b>Antenatal Betamethasone</b>    | No               | 4688                     | Reference                  |
|                                   | Yes              | 24295                    | 0.70 (0.64, 0.77) <0.001   |
| <b>Sex</b>                        | Female           | 13584                    | Reference                  |
|                                   | Male             | 15399                    | 1.17 (1.10, 1.25) <0.001   |
| <b>Race and Ethnicity</b>         | White            | 13117                    | Reference                  |
|                                   | Asian            | 929                      | 0.80 (0.65, 0.98) 0.034    |
|                                   | Black            | 7955                     | 0.88 (0.81, 0.95) 0.001    |
|                                   | Hispanic         | 4792                     | 1.31 (1.19, 1.44) <0.001   |
|                                   | Other            | 2190                     | 0.93 (0.82, 1.07) 0.320    |
| <b>Gestational Age (weeks)</b>    | 28983            | 0.61 (0.60, 0.62) <0.001 |                            |
| <b>Birth Weight (Z-score)</b>     | 28983            | 0.40 (0.37, 0.43) <0.001 |                            |
| <b>Delivery Mode</b>              | Vaginal          | 2565                     | Reference                  |
|                                   | Cesarean Section | 26418                    | 0.64 (0.57, 0.73) <0.001   |
| <b>Discharge Year</b>             | 2000 to 2004     | 4423                     | Reference                  |
|                                   | 2005 to 2009     | 7773                     | 0.98 (0.89, 1.09) 0.734    |
|                                   | 2010 to 2014     | 7883                     | 0.70 (0.63, 0.78) <0.001   |
|                                   | 2015 to 2020     | 8904                     | 0.62 (0.56, 0.69) <0.001   |
| <b>Intubation within 72 Hours</b> | No               | 17689                    | Reference                  |
|                                   | Yes              | 11294                    | 2.86 (2.66, 3.08) <0.001   |
| <b>Genetic Disorder</b>           | Absent           | 28193                    | Reference                  |
|                                   | Present          | 790                      | 2.12 (1.77, 2.55) <0.001   |
| <b>Congenital Anomaly</b>         | Absent           | 26645                    | Reference                  |
|                                   | Cardiac          | 568                      | 2.07 (1.68, 2.56) <0.001   |
|                                   | Gastrointestinal | 373                      | 5.11 (3.91, 6.71) <0.001   |
|                                   | Hydrops          | 24                       | 17.38 (4.93, 85.73) <0.001 |
|                                   | Multiple         | 295                      | 8.91 (6.65, 12.01) <0.001  |
|                                   | Neurological     | 406                      | 3.36 (2.62, 4.30) <0.001   |
|                                   | Pulmonary        | 41                       | 4.69 (2.23, 10.27) <0.001  |
|                                   | Renal            | 631                      | 2.29 (1.87, 2.81) <0.001   |

334  
 335 **Figure 2.** Multivariable logistic regression of clinical characteristics of preterm SGA infants with  
 336 severe morbidity or mortality (versus preterm SGA infants without severe morbidity or mortality).  
 337 Within the subset of preterm infants born SGA, regression was performed against the combined  
 338 outcome of mortality or severe morbidity. Antenatal betamethasone, maternal identification as  
 339 Asian or Black, increasing gestational age, increasing birth weight, cesarean delivery, and later  
 340 epochs were found to be associated with lower adjusted odds of the composite outcome. Male  
 341 sex, maternal identification as Hispanic, intubation after birth, and the presence of known  
 342 genetic disorders or congenital anomalies were associated with greater adjusted odds of the  
 343 composite outcome.

344  
 345

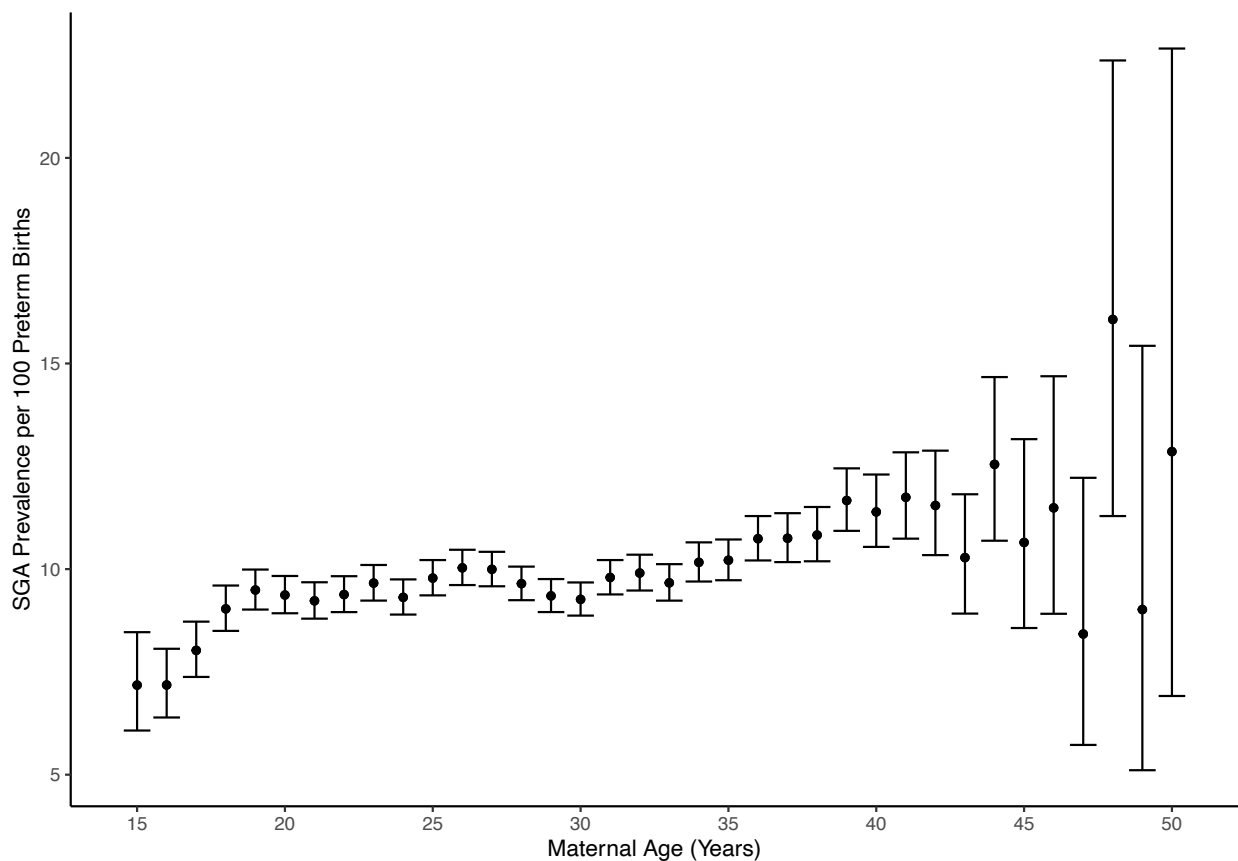

346  
347 **Figure 3.** Prevalence of SGA birth by maternal age. The prevalence of SGA birth was  
348 determined (within preterm births) for each year of maternal age from 15 to 50. Error bars depict  
349 the 95% CI. Extreme maternal ages, less than 15 and greater than 50, were excluded from the  
350 analysis due to their small sample size. For each one year increase in maternal age, on  
351 average, there was a 0.107 increase in SGA prevalence per 100 preterm births (adjusted  $r^2 =$   
352 0.46,  $p = <0.001$ ).

353  
354  
355  
356  
357

## 358 References

- 359 1. Bernstein IM, Horbar JD, Badger GJ, Ohlsson A, Golan A. Morbidity and mortality  
360 among very-low-birth-weight neonates with intrauterine growth restriction. The Vermont Oxford  
361 Network. *Am J Obstet Gynecol*. Jan 2000;182(1 Pt 1):198-206. doi:10.1016/s0002-  
362 9378(00)70513-8
- 363 2. Zeitlin J, El Ayoubi M, Jarreau PH, et al. Impact of fetal growth restriction on mortality  
364 and morbidity in a very preterm birth cohort. *J Pediatr*. Nov 2010;157(5):733-9.e1.  
365 doi:10.1016/j.jpeds.2010.05.002
- 366 3. Peacock JL, Lo JW, D'Costa W, Calvert S, Marlow N, Greenough A. Respiratory  
367 morbidity at follow-up of small-for-gestational-age infants born very prematurely. *Pediatr Res*.  
368 Apr 2013;73(4 Pt 1):457-63. doi:10.1038/pr.2012.201
- 369 4. De Jesus LC, Pappas A, Shankaran S, et al. Outcomes of small for gestational age  
370 infants born at <27 weeks' gestation. *J Pediatr*. Jul 2013;163(1):55-60.e1-3.  
371 doi:10.1016/j.jpeds.2012.12.097
- 372 5. Garite TJ, Clark R, Thorp JA. Intrauterine growth restriction increases morbidity and  
373 mortality among premature neonates. *Am J Obstet Gynecol*. Aug 2004;191(2):481-7.  
374 doi:10.1016/j.ajog.2004.01.036
- 375 6. Mendez-Figueroa H, Truong VT, Pedroza C, Chauhan SP. Morbidity and Mortality in  
376 Small-for-Gestational-Age Infants: A Secondary Analysis of Nine MFMU Network Studies. *Am J*  
377 *Perinatol*. Mar 2017;34(4):323-332. doi:10.1055/s-0036-1586502
- 378 7. Horbar JD, Carpenter JH, Badger GJ, et al. Mortality and neonatal morbidity among  
379 infants 501 to 1500 grams from 2000 to 2009. *Pediatrics*. Jun 2012;129(6):1019-26.  
380 doi:10.1542/peds.2011-3028
- 381 8. Baer RJ, Rogers EE, Partridge JC, et al. Population-based risks of mortality and preterm  
382 morbidity by gestational age and birth weight. *J Perinatol*. Nov 2016;36(11):1008-1013.  
383 doi:10.1038/jp.2016.118
- 384 9. Minor KC, Bianco K, Sie L, Druzin ML, Lee HC, Leonard SA. Severity of small-for-  
385 gestational-age and morbidity and mortality among very preterm neonates. *J Perinatol*. Apr  
386 2023;43(4):437-444. doi:10.1038/s41372-022-01544-w
- 387 10. Fenton TR, Kim JH. A systematic review and meta-analysis to revise the Fenton growth  
388 chart for preterm infants. *BMC Pediatr*. Apr 20 2013;13:59. doi:10.1186/1471-2431-13-59
- 389 11. Clayton PE, Cianfarani S, Czernichow P, Johannsson G, Rapaport R, Rogol A.  
390 Management of the child born small for gestational age through to adulthood: a consensus  
391 statement of the International Societies of Pediatric Endocrinology and the Growth Hormone  
392 Research Society. *J Clin Endocrinol Metab*. Mar 2007;92(3):804-10. doi:10.1210/jc.2006-2017
- 393 12. Lee PA, Chernausek SD, Hokken-Koelega AC, Czernichow P. International Small for  
394 Gestational Age Advisory Board consensus development conference statement: management  
395 of short children born small for gestational age, April 24-October 1, 2001. *Pediatrics*. Jun  
396 2003;111(6 Pt 1):1253-61. doi:10.1542/peds.111.6.1253
- 397 13. Katz J, Lee AC, Kozuki N, et al. Mortality risk in preterm and small-for-gestational-age  
398 infants in low-income and middle-income countries: a pooled country analysis. *Lancet*. Aug 3  
399 2013;382(9890):417-425. doi:10.1016/s0140-6736(13)60993-9
- 400 14. Finken MJ, van der Steen M, Smeets CCJ, et al. Children Born Small for Gestational  
401 Age: Differential Diagnosis, Molecular Genetic Evaluation, and Implications. *Endocr Rev*. Dec 1  
402 2018;39(6):851-894. doi:10.1210/er.2018-00083
- 403 15. McCowan L, Horgan RP. Risk factors for small for gestational age infants. *Best Pract*  
404 *Res Clin Obstet Gynaecol*. Dec 2009;23(6):779-93. doi:10.1016/j.bpobgyn.2009.06.003
- 405 16. Wollmann HA. Intrauterine growth restriction: definition and etiology. *Horm Res*. 1998;49  
406 Suppl 2:1-6. doi:10.1159/000053079

- 407 17. Mone F, Mellis R, Gabriel H, et al. Should we offer prenatal exome sequencing for  
408 intrauterine growth restriction or short long bones? A systematic review and meta-analysis. *Am*  
409 *J Obstet Gynecol*. Oct 7 2022;doi:10.1016/j.ajog.2022.09.045
- 410 18. Meler E, Sisterna S, Borrell A. Genetic syndromes associated with isolated fetal growth  
411 restriction. *Prenat Diagn*. Mar 2020;40(4):432-446. doi:10.1002/pd.5635
- 412 19. Peng R, Yang J, Xie HN, Lin MF, Zheng J. Chromosomal and subchromosomal  
413 anomalies associated to small for gestational age fetuses with no additional structural  
414 anomalies. *Prenat Diagn*. Dec 2017;37(12):1219-1224. doi:10.1002/pd.5169
- 415 20. Borrell A, Grande M, Meler E, et al. Genomic Microarray in Fetuses with Early Growth  
416 Restriction: A Multicenter Study. *Fetal Diagn Ther*. 2017;42(3):174-180. doi:10.1159/000452217
- 417 21. Motelow JE, Lippa NC, Hostyk J, et al. Risk Variants in the Exomes of Children With  
418 Critical Illness. *JAMA Netw Open*. Oct 3 2022;5(10):e2239122.  
419 doi:10.1001/jamanetworkopen.2022.39122
- 420 22. Stanley KE, Giordano J, Thorsten V, et al. Causal Genetic Variants in Stillbirth. *N Engl J*  
421 *Med*. Sep 17 2020;383(12):1107-1116. doi:10.1056/NEJMoa1908753
- 422 23. Petrovski S, Aggarwal V, Giordano JL, et al. Whole-exome sequencing in the evaluation  
423 of fetal structural anomalies: a prospective cohort study. *Lancet*. Feb 23 2019;393(10173):758-  
424 767. doi:10.1016/S0140-6736(18)32042-7
- 425 24. Lord J, McMullan DJ, Eberhardt RY, et al. Prenatal exome sequencing analysis in fetal  
426 structural anomalies detected by ultrasonography (PAGE): a cohort study. *Lancet*. Feb 23  
427 2019;393(10173):747-757. doi:10.1016/S0140-6736(18)31940-8
- 428 25. Bertoli-Avella AM, Beetz C, Ameziane N, et al. Successful application of genome  
429 sequencing in a diagnostic setting: 1007 index cases from a clinically heterogeneous cohort.  
430 *Eur J Hum Genet*. Jan 2021;29(1):141-153. doi:10.1038/s41431-020-00713-9
- 431 26. Hays T, Wapner RJ. Genetic testing for unexplained perinatal disorders. *Curr Opin*  
432 *Pediatr*. Apr 1 2021;33(2):195-202. doi:10.1097/MOP.0000000000000999
- 433 27. Spitzer AR, Ellsbury DL, Handler D, Clark RH. The Pediatrix BabySteps Data  
434 Warehouse and the Pediatrix QualitySteps improvement project system--tools for "meaningful  
435 use" in continuous quality improvement. *Clin Perinatol*. Mar 2010;37(1):49-70.  
436 doi:10.1016/j.clp.2010.01.016
- 437 28. Grantz KL, Grewal J, Kim S, et al. Unified standard for fetal growth: the Eunice Kennedy  
438 Shriver National Institute of Child Health and Human Development Fetal Growth Studies. *Am J*  
439 *Obstet Gynecol*. Apr 2022;226(4):576-587.e2. doi:10.1016/j.ajog.2021.12.006
- 440 29. Tolia VN, Clark RH. The Denominator Matters! Lessons from Large Database Research  
441 in Neonatology. *Children (Basel)*. Nov 7 2020;7(11):216-216. doi:10.3390/children7110216
- 442 30. Papile LA, Burstein J, Burstein R, Koffler H. Incidence and evolution of subependymal  
443 and intraventricular hemorrhage: a study of infants with birth weights less than 1,500 gm. *J*  
444 *Pediatr*. Apr 1978;92(4):529-34. doi:10.1016/s0022-3476(78)80282-0
- 445 31. Stevenson DK, Verter J, Fanaroff AA, et al. Sex differences in outcomes of very low  
446 birthweight infants: the newborn male disadvantage. *Arch Dis Child Fetal Neonatal Ed*. Nov  
447 2000;83(3):F182-5. doi:10.1136/fn.83.3.f182
- 448 32. Peacock JL, Marston L, Marlow N, Calvert SA, Greenough A. Neonatal and infant  
449 outcome in boys and girls born very prematurely. *Pediatr Res*. Mar 2012;71(3):305-10.  
450 doi:10.1038/pr.2011.50
- 451 33. *R: A language and environment for statistical computing*. R Foundation for Statistical  
452 Computing; 2022. <https://www.R-project.org/>
- 453 34. Schlüter DK, Griffiths R, Adam A, et al. Impact of cystic fibrosis on birthweight: a  
454 population based study of children in Denmark and Wales. *Thorax*. 2019;74(5):447-454.  
455 doi:10.1136/thoraxjnl-2018-211706



- 456 35. Giorgione V, Briffa C, Di Fabrizio C, Bhate R, Khalil A. Perinatal Outcomes of Small for  
457 Gestational Age in Twin Pregnancies: Twin vs. Singleton Charts. *J Clin Med*. Feb 8  
458 2021;10(4)doi:10.3390/jcm10040643
- 459 36. D'Antonio F, Khalil A, Dias T, Thilaganathan B. Weight discordance and perinatal  
460 mortality in twins: analysis of the Southwest Thames Obstetric Research Collaborative (STORK)  
461 multiple pregnancy cohort. *Ultrasound Obstet Gynecol*. Jun 2013;41(6):643-8.  
462 doi:10.1002/uog.12412
- 463 37. Townsend R, Khalil A. Fetal growth restriction in twins. *Best Pract Res Clin Obstet*  
464 *Gynaecol*. May 2018;49:79-88. doi:10.1016/j.bpobgyn.2018.02.004
- 465 38. Kim F, Bateman DA, Goldshtrom N, Sheen J-J, Garey D. Intracranial ultrasound  
466 abnormalities and mortality in preterm infants with and without fetal growth restriction stratified  
467 by fetal Doppler study results. *Journal of Perinatology*. 2023/01/30 2023;doi:10.1038/s41372-  
468 023-01621-8
- 469 39. Procianoy RS, Garcia-Prats JA, Adams JM, Silvers A, Rudolph AJ. Hyaline membrane  
470 disease and intraventricular haemorrhage in small for gestational age infants. *Arch Dis Child*.  
471 Jul 1980;55(7):502-5. doi:10.1136/adc.55.7.502
- 472 40. Gilbert WM, Danielsen B. Pregnancy outcomes associated with intrauterine growth  
473 restriction. *American Journal of Obstetrics and Gynecology*. 2003/06/01/ 2003;188(6):1596-  
474 1601. doi:<https://doi.org/10.1067/mob.2003.384>
- 475 41. Sacchi C, Marino C, Nosarti C, Vieno A, Visentin S, Simonelli A. Association of  
476 Intrauterine Growth Restriction and Small for Gestational Age Status With Childhood Cognitive  
477 Outcomes: A Systematic Review and Meta-analysis. *JAMA Pediatr*. Aug 1 2020;174(8):772-  
478 781. doi:10.1001/jamapediatrics.2020.1097
- 479 42. Roberts D, Brown J, Medley N, Dalziel SR. Antenatal corticosteroids for accelerating  
480 fetal lung maturation for women at risk of preterm birth. *Cochrane Database Syst Rev*. Mar 21  
481 2017;3(3):Cd004454. doi:10.1002/14651858.CD004454.pub3
- 482 43. Blankenship SA, Brown KE, Simon LE, Stout MJ, Tuuli MG. Antenatal corticosteroids in  
483 preterm small-for-gestational age infants: a systematic review and meta-analysis. *Am J Obstet*  
484 *Gynecol MFM*. Nov 2020;2(4):100215. doi:10.1016/j.ajogmf.2020.100215
- 485 44. Schmidt B, Davis P, Moddemann D, et al. Long-term effects of indomethacin prophylaxis  
486 in extremely-low-birth-weight infants. *N Engl J Med*. Jun 28 2001;344(26):1966-72.  
487 doi:10.1056/nejm200106283442602
- 488 45. Mirza H, Laptook AR, Oh W, et al. Effects of indomethacin prophylaxis timing on  
489 intraventricular haemorrhage and patent ductus arteriosus in extremely low birth weight infants.  
490 *Arch Dis Child Fetal Neonatal Ed*. Sep 2016;101(5):F418-22. doi:10.1136/archdischild-2015-  
491 309112
- 492 46. Foglia EE, Roberts RS, Stoller JZ, Davis PG, Haslam R, Schmidt B. Effect of  
493 Prophylactic Indomethacin in Extremely Low Birth Weight Infants Based on the Predicted Risk  
494 of Severe Intraventricular Hemorrhage. *Neonatology*. 2018;113(2):183-186.  
495 doi:10.1159/000485172
- 496 47. Fetal Growth Restriction: ACOG Practice Bulletin, Number 227. *Obstet Gynecol*. Feb 1  
497 2021;137(2):e16-e28. doi:10.1097/aog.0000000000004251
- 498 48. Martins JG, Biggio JR, Abuhamad A. Society for Maternal-Fetal Medicine Consult Series  
499 #52: Diagnosis and management of fetal growth restriction: (Replaces Clinical Guideline  
500 Number 3, April 2012). *Am J Obstet Gynecol*. Oct 2020;223(4):B2-b17.  
501 doi:10.1016/j.ajog.2020.05.010
- 502 49. Dauber A. Genetic Testing for the Child With Short Stature-Has the Time Come To  
503 Change Our Diagnostic Paradigm? *J Clin Endocrinol Metab*. Jul 1 2019;104(7):2766-2769.  
504 doi:10.1210/jc.2019-00019
- 505 50. Rapaport R, Wit JM, Savage MO. Growth failure: 'idiopathic' only after a detailed  
506 diagnostic evaluation. *Endocr Connect*. Mar 2021;10(3):R125-r138. doi:10.1530/ec-20-0585

- 507 51. Clark MM, Stark Z, Farnaes L, et al. Meta-analysis of the diagnostic and clinical utility of  
508 genome and exome sequencing and chromosomal microarray in children with suspected  
509 genetic diseases. *NPJ Genom Med*. 2018;3(1):16. doi:10.1038/s41525-018-0053-8  
510 52. Wojcik MH, Schwartz TS, Yamin I, et al. Genetic disorders and mortality in infancy and  
511 early childhood: delayed diagnoses and missed opportunities. *Genet Med*. Nov  
512 2018;20(11):1396-1404. doi:10.1038/gim.2018.17  
513
- 514

515 **Supplemental Table 1.** Unadjusted odds of SGA birth associated for specific genetic disorders.

| <b>Genetic Disorder</b>                 | <b>SGA (n)</b> | <b>AGA (n)</b> | <b>OR (99.75% CI)</b> |
|-----------------------------------------|----------------|----------------|-----------------------|
| <b>Aneuploidy</b>                       |                |                |                       |
| Trisomy 13                              | 32             | 109            | 2.76 (1.50–5.08)      |
| Trisomy 18                              | 145            | 80             | 17.06 (11.19-26.00)   |
| Trisomy 21                              | 286            | 987            | 2.73 (2.22-3.34)      |
| Trisomy 22                              | 1              | 2              | 4.71 (0.12-190.89)    |
| Turner syndrome                         | 17             | 34             | 4.71 (1.92-11.55)     |
| Klinefelter syndrome                    | 9              | 35             | 2.42 (0.78-7.49)      |
| Unspecified aneuploidy                  | 204            | 554            | 3.47 (2.70-4.44)      |
| <b>Copy Number Variant</b>              |                |                |                       |
| 13q deletion                            | 3              | 8              | 3.53 (0.46-27.33)     |
| Cri-du-chat                             | 4              | 17             | 2.21 (0.41-11.88)     |
| DiGeorge syndrome                       | 9              | 54             | 1.57 (0.53-4.66)      |
| Unspecified copy number variant         | 15             | 31             | 4.55 (1.76-11.79)     |
| <b>Hematologic Single Gene Disorder</b> |                |                |                       |
| Hemophilia A                            | 1              | 12             | 0.78 (0.03-18.25)     |
| Thalassemia                             | 169            | 1256           | 1.27 (0.99-1.62)      |
| Hemoglobin Bart's                       | 39             | 391            | 0.94 (0.56-1.56)      |
| Sickle cell anemia                      | 48             | 196            | 2.30 (1.42-3.75)      |
| G6PD deficiency                         | 32             | 200            | 1.51 (0.85-2.68)      |



| <b>Genetic Disorder</b> | <b>SGA (n)</b> | <b>AGA (n)</b> | <b>OR (99.75% CI)</b> |
|-------------------------|----------------|----------------|-----------------------|
| Fanconi anemia          | 2              | 1              | 18.82 (0.46-763.54)   |
| <b>Miscellaneous</b>    |                |                |                       |
| Cystic fibrosis         | 48             | 206            | 2.19 (1.35-3.56)      |
| Hypophosphatasia        | 41             | 80             | 4.82 (2.70-8.62)      |
| Multiple diagnoses      | 7              | 9              | 7.32 (1.60-33.59)     |

516  
517 Abbreviations: AGA (appropriate for gestational age), CI (confidence interval), OR (odds ratio),  
518 SGA (small for gestational age)  
519

520  
521  
522  
523  
524  
525  
526  
527  
528  
529  
530  
531  
532  
533  
534  
535  
536  
537  
538  
539  
540  
541

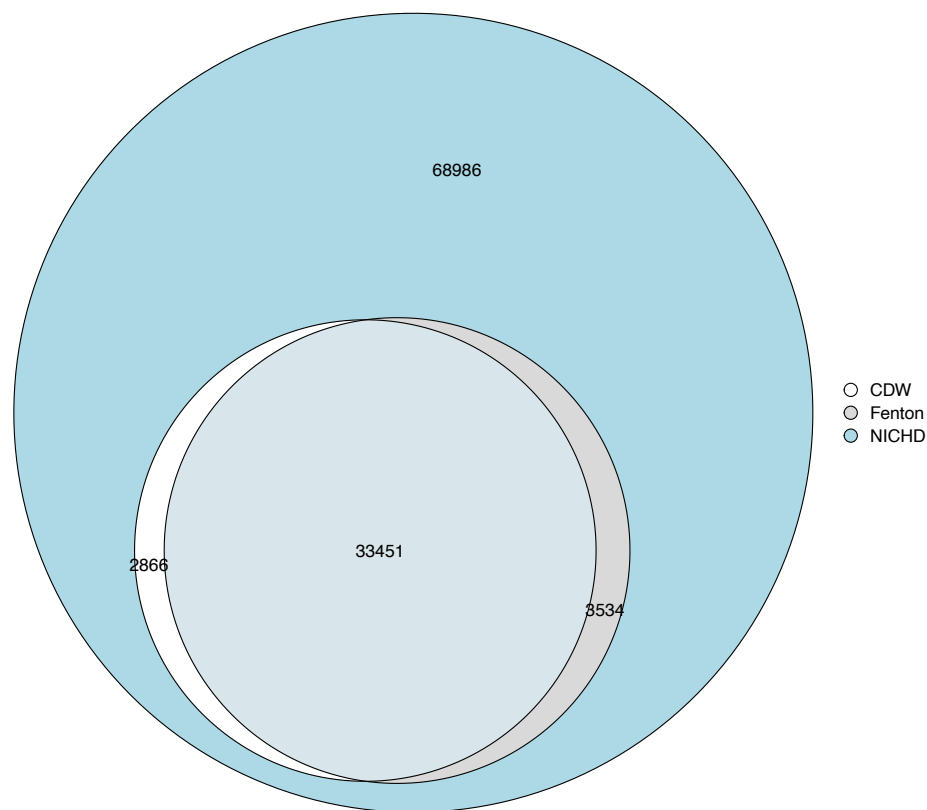

**Supplemental Figure 1.** Classification of SGA or FGR birth in this cohort by related criteria.

This cohort included 409,399 preterm infants from the Pediatrix CDW. SGA was defined for this study as below the 10<sup>th</sup> percentile for gestational age and sex within the CDW cohort. 36,985 infants met this definition, all of whom were below the 10<sup>th</sup> percentile for NICHD fetal growth. 33,451 (92.1%) of these infants also fell below the Fenton 10<sup>th</sup> percentile definition of SGA birth. The numbers of infants meeting these criteria are depicted in the Euler diagram above.

542

| Variable                    | N                | Odds ratio               | p                        |
|-----------------------------|------------------|--------------------------|--------------------------|
| <b>Race and Ethnicity</b>   | White            | 111314                   | Reference                |
|                             | Asian            | 7672                     | 1.02 (0.94, 1.10) 0.7    |
|                             | Black            | 67874                    | 1.18 (1.14, 1.22) <0.001 |
|                             | Hispanic         | 55644                    | 0.82 (0.79, 0.85) <0.001 |
|                             | Other            | 19812                    | 1.03 (0.98, 1.08) 0.3    |
| <b>Maternal Age (years)</b> | 10-19            | 29599                    | Reference                |
|                             | 20-29            | 129969                   | 1.17 (1.12, 1.22) <0.001 |
|                             | 30-39            | 92726                    | 1.26 (1.21, 1.32) <0.001 |
|                             | 40-49            | 9971                     | 1.39 (1.29, 1.50) <0.001 |
|                             | 50-60            | 51                       | 1.16 (0.40, 2.65) 0.8    |
| <b>Discharge Year</b>       | 2000 to 2004     | 36019                    | Reference                |
|                             | 2005 to 2009     | 71117                    | 1.02 (0.97, 1.06) 0.5    |
|                             | 2010 to 2014     | 72055                    | 1.01 (0.97, 1.05) 0.7    |
|                             | 2015 to 2020     | 83125                    | 1.02 (0.98, 1.07) 0.3    |
| <b>Genetic Disorder</b>     | Absent           | 258130                   | Reference                |
|                             | Present          | 4186                     | 2.09 (1.93, 2.25) <0.001 |
| <b>Congenital Anomaly</b>   | Absent           | 243621                   | Reference                |
|                             | Cardiac          | 4665                     | 1.40 (1.28, 1.52) <0.001 |
|                             | Gastrointestinal | 3506                     | 1.52 (1.38, 1.67) <0.001 |
|                             | Hydrops          | 279                      | 1.06 (0.71, 1.52) 0.8    |
|                             | Multiple         | 2051                     | 1.94 (1.73, 2.17) <0.001 |
|                             | Neurological     | 3455                     | 1.38 (1.25, 1.53) <0.001 |
|                             | Pulmonary        | 360                      | 1.29 (0.93, 1.75) 0.1    |
| Renal                       | 4379             | 1.56 (1.43, 1.69) <0.001 |                          |

543 **Supplemental Figure 2.** Multivariable logistic regression for SGA versus AGA status in preterm  
 544 infants with singleton gestation. The outcome of preterm SGA status was modeled as before  
 545 (**Figure 1**) in only infants born following singleton gestation. Nearly identical adjusted odds were  
 546 found for all covariates.

547

548

549

| Variable                          | N                | Odds ratio               | p                          |
|-----------------------------------|------------------|--------------------------|----------------------------|
| <b>Antenatal Betamethasone</b>    | No               | 3537                     | Reference                  |
|                                   | Yes              | 17542                    | 0.66 (0.60, 0.73) <0.001   |
| <b>Sex</b>                        | Female           | 9753                     | Reference                  |
|                                   | Male             | 11326                    | 1.17 (1.08, 1.26) <0.001   |
| <b>Race and Ethnicity</b>         | White            | 8780                     | Reference                  |
|                                   | Asian            | 655                      | 0.76 (0.59, 0.96) 0.03     |
|                                   | Black            | 6290                     | 0.92 (0.84, 1.01) 0.09     |
|                                   | Hispanic         | 3712                     | 1.44 (1.29, 1.60) <0.001   |
| Other                             | 1642             | 0.99 (0.85, 1.15) 0.86   |                            |
| <b>Gestational Age (weeks)</b>    | 21079            | 0.61 (0.60, 0.62) <0.001 |                            |
| <b>Birth Weight (Z-score)</b>     | 21079            | 0.38 (0.35, 0.42) <0.001 |                            |
| <b>Delivery Mode</b>              | Vaginal          | 1948                     | Reference                  |
|                                   | Cesarean Section | 19131                    | 0.60 (0.52, 0.70) <0.001   |
| <b>Discharge Year</b>             | 2000 to 2004     | 2651                     | Reference                  |
|                                   | 2005 to 2009     | 5683                     | 1.01 (0.89, 1.14) 0.93     |
|                                   | 2010 to 2014     | 5893                     | 0.72 (0.64, 0.82) <0.001   |
|                                   | 2015 to 2020     | 6852                     | 0.66 (0.58, 0.75) <0.001   |
| <b>Intubation within 72 Hours</b> | No               | 12387                    | Reference                  |
|                                   | Yes              | 8692                     | 2.85 (2.61, 3.10) <0.001   |
| <b>Genetic Disorder</b>           | Absent           | 20445                    | Reference                  |
|                                   | Present          | 634                      | 2.17 (1.77, 2.66) <0.001   |
| <b>Congenital Anomaly</b>         | Absent           | 19301                    | Reference                  |
|                                   | Cardiac          | 411                      | 2.10 (1.63, 2.69) <0.001   |
|                                   | Gastrointestinal | 292                      | 5.67 (4.17, 7.74) <0.001   |
|                                   | Hydrops          | 19                       | 14.69 (3.93, 75.11) <0.001 |
|                                   | Multiple         | 222                      | 8.91 (6.37, 12.57) <0.001  |
|                                   | Neurological     | 316                      | 3.07 (2.32, 4.06) <0.001   |
|                                   | Pulmonary        | 30                       | 7.61 (3.07, 20.95) <0.001  |
|                                   | Renal            | 488                      | 1.98 (1.57, 2.50) <0.001   |

550

551 **Supplemental Figure 3.** Multivariable logistic regression for severe morbidity or mortality in  
 552 SGA preterm infants following singleton gestation. The combined outcome of mortality or severe  
 553 morbidity status for preterm SGA infants was modeled as before (**Figure 2**) in only infants born  
 554 following singleton gestation. Nearly identical adjusted odds were found for all covariates.

555

556

## 557 eMethods

558

559 The following script was used to generate tables and figures. The script was created using RStudio

560 (version 2022.07.0).

561

### 562 ##### Table 1

563

564 ## Import Data

565

566 setwd("/Users/Miles/Desktop")

567 Prevalence <- read.csv("Prev\_Update\_GxDx.csv")

568 Prevalence1 <- Prevalence

569 library(dplyr)

570 library(table1)

571

572 ## Data cleaning

573

574 Prevalence2 <- Prevalence1 %>% filter(BW\_Z\_Score <= 1.282)

575

576 Prevalence3 <- Prevalence2 %>% mutate(SGA = case\_when (BW\_Z\_Score < -1.282 ~ 'SGA',

577 BW\_Z\_Score >= -1.282 ~ 'AGA'))

578

579 Prevalence4 <- Prevalence3 %>% mutate(Genetic = ifelse(GxDx == "Absent", "Absent", "Present"))

580

581 Prevalence4\$DY <- as.factor(ifelse(Prevalence4\$DischargeYear < 2005, "2000 to 2004",

582 ifelse(Prevalence4\$DischargeYear < 2010, "2005 to 2009", ifelse(Prevalence4\$DischargeYear < 2015,

583 "2010 to 2014", "2015 to 2020"))))

584

585 ## Label Data

586

587 label(Prevalence4\$BW) <- "Birthweight (kg)"

588 label(Prevalence4\$GA) <- "Gestational Age (weeks)"

589 label(Prevalence4\$GxDx) <- "Known Genetic Disorder"

590 label(Prevalence4\$Any\_Anom) <- "Congenital Anomaly"

591 label(Prevalence4\$SGA) <- "SGA Birth"

592 label(Prevalence4\$Genetic) <- "Genetic Disorder"

593

594 ## Calculate p-values for Table1

595

596 pvalue <- function(x, ...) {

597 # Construct vectors of data y, and groups (strata) g

598 y <- unlist(x)

599 g <- factor(rep(1:length(x), times=sapply(x, length)))

600 if (is.numeric(y)) {

601 # For numeric variables, perform a standard 2-sample t-test

602 p <- t.test(y ~ g)\$p.value

603 } else {

604 # For categorical variables, perform a chi-squared test of independence

605 p <- chisq.test(table(y, g))\$p.value

606 }

607 # Format the p-value, using an HTML entity for the less-than sign.

608 # The initial empty string places the output on the line below the variable label.

609 c("", sub("<", "&lt;", format.pval(p, digits=3, eps = 1e-200)))

610 }

611

612 ## Table 1

```
613
614 table1(~ Sex + GA + Race + MaternalAge + DY + Genetic + Any_Anom |SGA, data=Prevalence4,
615 overall=F, extra.col=list(`P-value`=pvalue))
616

617 ####Table 2:
618
619 ##Inport Data
620
621 setwd("/Users/Miles/Desktop")
622 Outcome <- read.csv("Outcome_Update_GxDx.csv")
623 Outcome1 <- Outcome
624 library(dplyr)
625
626 ## Clean the data and make new varriables
627
628 Outcome2 <- Outcome1 %>% mutate(SGA = case_when (BW_Z_Score < -1.282 ~ '1', BW_Z_Score >= -
629 1.282 ~ '0'))
630
631 Outcome3 <- Outcome2 %>% filter(BW_Z_Score <= 1.282)
632
633 Outcome4 <- Outcome3 %>% mutate(Additional_Anom = ifelse(Any_Anom == "Absent", "0", "1"))
634
635 ##Perform sum calculations
636 sum(Outcome4$SGA == "1" & Outcome4$Additional_Anom == "1" & Outcome4$CritIllorDeath == "Y")
637 ##Used this model for all the possible scenarios and then put them into an excel sheet
638 ##Excel Table 2 and Figure_2 were created for export
639
640 ## Load packages
641
642 library(tidyverse)
643 library(pixiedust)
644 library(kableExtra)
645 library(webshot)
646
647 ##Load data
648
649 Pos <-read.csv("Figure_2_Bonferroni_Corrected.csv")
650
651 tbl1 <- dust(Pos)
652
653 ##Plot
654
655 tbl1 %>%
656   sprinkle_colnames(Outcome = "Outcome*", Isolated = "Isolated SGA", Syndromic= "SGA with Additional
657   Congenital Anomaly") %>%
658   kable() %>% kable_styling() %>%
659   add_header_above(c(" " = 1, "OR (95% CI)" = 2))%>%
660   kable_classic(full_width = F, html_font = "Arial") %>%
661   footnote("AKI: acute kidney injury, ICH: intracranial hemorrhage, NEC: necrotizing enterocolitis, BPD:
662   bronchopulmonary dysplasia, ROP: retinopathy of prematurity", general_title = "*Abbreviations")
663

664 ####Figure 1
665
666 ##import data
```

```
667
668 setwd("/Users/Miles/Desktop")
669 Prevalence <- read.csv("Prev_Update_GxDx.csv")
670 Prevalence1 <- Prevalence
671 library(dplyr)
672
673 ##clean data and make new variables
674
675 Prevalence2 <- Prevalence1 %>% filter(BW_Z_Score <= 1.282)
676 Prevalence3 <- Prevalence2 %>% mutate(SGA = case_when (BW_Z_Score < -1.282 ~ '1', BW_Z_Score
677 >= -1.282 ~ '0'))
678 Prevalence4 <- Prevalence3 %>% mutate(Genetic = ifelse(GxDx == "Absent", "Absent", "Present"))
679 Prevalence4$MA <- as.factor(ifelse(Prevalence4$MaternalAge < 20, "10-19",
680 ifelse(Prevalence4$MaternalAge < 30, "20-29", ifelse(Prevalence4$MaternalAge < 40, "30-39",
681 ifelse(Prevalence4$MaternalAge < 50, "40-49", "50-60")))))
682 Prevalence4$Any_Anom <- as.factor(ifelse(Prevalence4$Any_Anom == "AG", "Genital",
683 ifelse(Prevalence4$Any_Anom == "CAKUT", "Renal", ifelse(Prevalence4$Any_Anom == "CHD",
684 "Cardiac", ifelse(Prevalence4$Any_Anom == "CNS", "Neurological", ifelse(Prevalence4$Any_Anom ==
685 "GI", "Gastrointestinal", ifelse(Prevalence4$Any_Anom == "Pulm", "Pulmonary",
686 ifelse(Prevalence4$Any_Anom == "Hydrops", "Hydrops", ifelse(Prevalence4$Any_Anom == "Multiple",
687 "Multiple", "Absent"))))))))
688 Prevalence4$DY <- as.factor(ifelse(Prevalence4$DischargeYear < 2005, "2000 to 2004",
689 ifelse(Prevalence4$DischargeYear < 2010, "2005 to 2009", ifelse(Prevalence4$DischargeYear < 2015,
690 "2010 to 2014", "2015 to 2020"))))
691
692 ##load packages
693
694 library(Hmisc)
695 library(expss)
696 library(gtsummary)
697 library(forestmodel)
698 library(lme4)
699
700 ##label data
701
702 Prevalence4$DischargeYear <- factor(Prevalence4$DischargeYear)
703 Prevalence4$Race <- factor(Prevalence4$Race)
704
705 Prevalence4$Race <- relevel(Prevalence4$Race, ref = "White")
706 Prevalence4$SGA <- factor(Prevalence4$SGA)
707 Prevalence4$Race <- factor(Prevalence4$Race)
708 Prevalence4$Sex <- factor(Prevalence4$Sex)
709 Prevalence4$Any_Anom <- factor(Prevalence4$Any_Anom)
710 Prevalence4$MA <- factor(Prevalence4$MA)
711 Prevalence4$DY <- factor(Prevalence4$DY)
712
713 label(Prevalence4$MA) <- "Maternal Age (years)"
714 label(Prevalence4$Race) <- "Race and Ethnicity"
715 label(Prevalence4$Genetic) <- "Genetic Disorder"
716 label(Prevalence4$Any_Anom) <- "Congenital Anomaly"
717 label(Prevalence4$DY) <- "Discharge Year"
718
719 ##multiple variable logistic regression model
720 LogReg3 <- glm(SGA~ Race + MA + DY + Genetic + Any_Anom, data = Prevalence4, family =
721 "binomial")
722 ##table depiction of model
```

```
723 forest_model(LogReg3, factor_separate_line = FALSE)
724
725 #####Figure 2:
726
727 ##Load data
728
729 setwd("/Users/Miles/Desktop")
730 Outcome <- read.csv("Outcome_Update_GxDx.csv")
731 Outcome1 <- Outcome
732 library(dplyr)
733
734 ##data preparation
735
736 Outcome2 <- Outcome1 %>% filter(BW_Z_Score <= 1.282)
737 Outcome3 <- Outcome2 %>% mutate(SGA = case_when (BW_Z_Score < -1.282 ~ '1', BW_Z_Score >= -
738 1.282 ~ '0'))
739 Outcome4 <- Outcome3 %>% mutate(Genetic = ifelse(GxDx == "Absent", "Absent", "Present"))
740 Outcome5 <- Outcome4 %>% filter(SGA == "1")
741 Outcome5$DY <- as.factor(ifelse(Outcome5$DischargeYear < 2005, "2000 to 2004",
742 ifelse(Outcome5$DischargeYear < 2010, "2005 to 2009", ifelse(Outcome5$DischargeYear < 2015, "2010
743 to 2014", "2015 to 2020"))))
744 Outcome6 <- Outcome5 %>% mutate(AntSter = ifelse(Antenatal.Steroids == "0", "No", "Yes"))
745 Outcome7 <- Outcome6 %>% mutate(MV72 = ifelse(MVD0.2 == "N", "No", "Yes"))
746 Outcome8 <- Outcome7 %>% filter(Deliv_Mode == "Cesarean Section" | Deliv_Mode == "Vaginal
747 Delivery")
748
749 ##load required packages
750
751 library(expss)
752 library(gtsummary)
753 library(forestmodel)
754 library(lme4)
755 library(Hmisc)
756
757 ##Label data
758
759 Outcome8$Sex <- factor(Outcome8$Sex)
760 Outcome8$Race <- factor(Outcome8$Race)
761 Outcome8$AntSter <- factor(Outcome8$AntSter)
762 Outcome8$CritIllorDeath <- factor(Outcome8$CritIllorDeath)
763 Outcome8$MV72 <- factor(Outcome8$MV72)
764 Outcome8$DY <- factor(Outcome8$DY)
765
766 Outcome8$Sex <- relevel(Outcome8$Sex, ref = "Female")
767 Outcome8$Race <- relevel(Outcome8$Race, ref = "White")
768
769 label(Outcome8$AntSter) <- "Antenatal Steroids"
770 label(Outcome8$Race) <- "Race and Ethnicity"
771 label(Outcome8$Genetic) <- "Genetic Disorder"
772 label(Outcome8$Any_Anom) <- "Congenital Anomaly"
773 label(Outcome8$DY) <- "Discharge Year"
774 label(Outcome8$MV72) <- "MV within 72 Hours"
775 label(Outcome8$GA) <- "Gestational Age (weeks)"
776 label(Outcome8$BW_Z_Score) <- "Birth Weight (Z-score)"
777
```



```
778 ## multiple variable logistic regression model
779
780 LogReg <- glm(CritIllorDeath ~ AntSter + Sex + Race + GA + BW_Z_Score + Deliv_Mode + DY + MV72
781 + Genetic + Any_Anom, data = Outcome8, family = "binomial")
782
783 ##table depiction of model
784
785 forest_model(LogReg, factor_separate_line = FALSE)
786
787 ####Figure 3:
788
789 ##load data
790
791 setwd("/Users/Miles/Desktop")
792 Prevalence <- read.csv("MA_V_Prev_per_100_Garphing.csv")
793 Prevalence1 <- Prevalence
794
795 ##uplaod required packages
796
797 library(dplyr)
798 library("ggplot2")
799
800
801 ##define and make plot
802
803 df <- ggplot(Prevalence1, aes(MA, Prev_Per_100)) + geom_point() + geom_errorbar(aes(ymin =
804 Low_per_100, ymax = Upp_per_100))
805
806 df + geom_point() + scale_x_continuous(breaks=seq(0, 60, 5)) + labs (x = 'Maternal Age (Years)', y =
807 'SGA Prevalence per 100 Preterm Births') + theme_bw() + theme(panel.border = element_blank(),
808 panel.grid.major = element_blank(),
809 panel.grid.minor =
810 element_blank(), axis.line = element_line(colour = "black"))
811
812 ####Running a linear regression
813
814 Reg <- lm(Prev_per_100 ~ MA, data = MA_V_Prev_per_100_Graphing.csv)
815
816 ##Review the results
817
818 Summary(Reg)
819
820
821 ####Supplemental table 1
822
823 ##Inport Data
824
825 setwd("/Users/Miles/Desktop")
826 GxDx <- read.csv("Updated_GxDx_SGA.csv")
827
828 ##Upload Packages
```

```
825
826 library(dplyr)
827 library(tidyverse)
828 library(pixiedust)
829 library(kableExtra)
830 library(webshot)
831
832 ##Make Table Backend
833
834 GxDx2 <- replace(GxDx, is.na(GxDx), "")
835
836 tbl3 <- dust(GxDx2)
837
838
839 ##Make the Table
840
841 tbl3 %>%
842   sprinkle_colnames(Genetic.Diagnosis = "Genetic Diagnosis", SGA = "SGA", AGA= "AGA", Crude.OR
843 = "Crude OR", X95_low = "Low 95 CI", X95_high = "High 95 CI") %>% kable() %>% kable_styling()
844 %>%
845   kable_classic(full_width = F, html_font = "Arial") %>%
846   row_spec(1,bold=T,hline_after = T) %>%
847   row_spec(9,bold=T,hline_after = T) %>%
848   row_spec(14,bold=T,hline_after = T) %>%
849   row_spec(21,bold=T,hline_after = T) %>%
850   add_indent(c(2,3,4,5,6,7,8,10,11,12,13,15,16,17,18,19,20,22,23,24))
851
852 ####Supplemental Figure 1
853
854 ## Load package
855 library(eulerr)
856
857 ## enter numbers of individuals in interaction of sets
858 fit1 <- euler(c("CDW "=0, "Fenton" = 0, "NICHD"=68986,
859   "CDW&Fenton"=0, "Fenton&NICHD"=3534, "CDW&NICHD"=2866,
860   "CDW&Fenton&NICHD"=33451))
861 ## plot Euler diagram
862 plot(fit1, quantities = TRUE, legend = TRUE)
863
864 ####Supplemental Figure 2
865 ##Same code as Figure 1 but added one line of code in data preparation
866
867 Prevalence4 <- Prevalence4 %>% filter(BirthNumber == "1")
868
869 ####Supplemental Figure 3
870 ##Same code as Figure 2 but added one line of code in data preparation
871 Outcome8 <- Outcome8 %>% filter(BirthNumber == "1")
872
873 ####Figure 1 Interaction Test
874 LogReg3 <- glm(SGA~ Race + MA + DY + Genetic + Any_Anom + Genetic*Any_Anom, data =
875 Prevalence4, family = "binomial")
876 anova(LogReg3, test='Chisq')
877 summary(LogReg3)
878
879 ####Figure 2 Interaction Test
```

```
880 LogReg5 <- glm(CritIllorDeath ~ Antenatal.Steroids + Sex + Race + GA + MVD0.2 + Any_Anom + DY +  
881 BW_Z_Score + Genetic + Deliv_Mode + Any_Anom + Genetic*Any_Anom, data = Outcome8,  
882 family = "binomial")  
883 anova(LogReg5, test='Chisq')  
884 summary(LogReg5)  
885  
886  
887
```
